# Supplementary material for: Revision of Cytomegalovirus Immunoglobulin M Antibody Titer Cutoff in a Maternal Antibody Screening Program in Japan: A Cohort Comparison Involving a Total of 32,000 Pregnant Women
Source: MDPI journal article supplement (doi:10.3390/v15040962), 2023-04-13
Supplement: s1 [file s1]

## Supplementary Materials

### Congenital cytomegalovirus (CMV) infection cases in pregnant women with high IgG avidity (the original CMV IgM cutoff period)

Forty-eight pregnant women with positive/equivocal IgG, IgM under the revised cut-off, and high IgG avidity underwent neonatal urine CMV DNA tests. Two infants had congenital cytomegalovirus (cCMV) infection and were symptomatic. One showed fetal ascites, whereas the other showed a unilateral threshold elevation on auditory brainstem response tests (Cases 13 and 14 in main text Table 1).

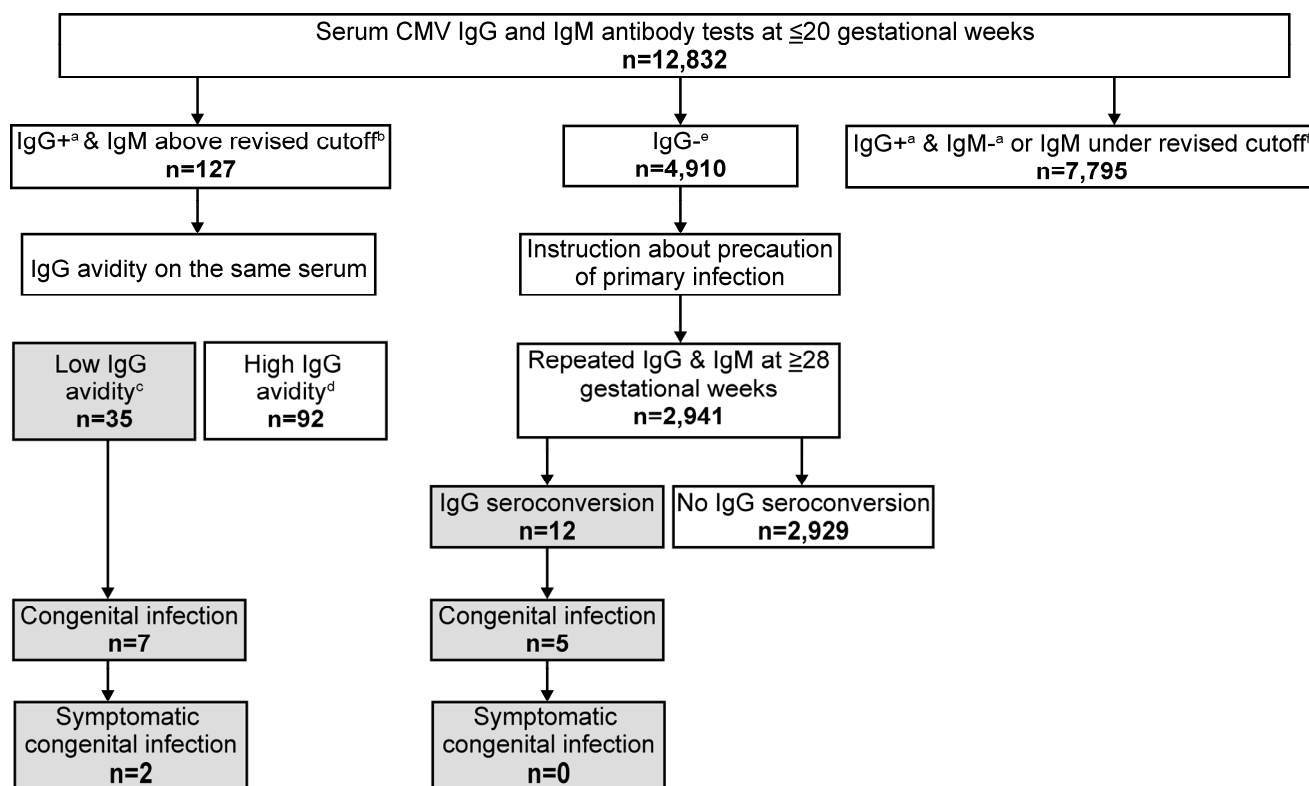

**Supplementary Figure S1.** Flowchart of the maternal cytomegalovirus (CMV) antibody screening program from April 2017 to March 2019, with the revised cutoff of CMV IgM antibody titer index.

<sup>a</sup>including equivocal IgG. <sup>b</sup>≥4.00 IgM antibody titer index. <sup>c</sup>≤35.0% IgG antibody avidity index.

<sup>d</sup>≥35.1% IgG antibody avidity index. <sup>e</sup>with any IgM antibody result. <sup>f</sup><4.00 IgM antibody titer index.

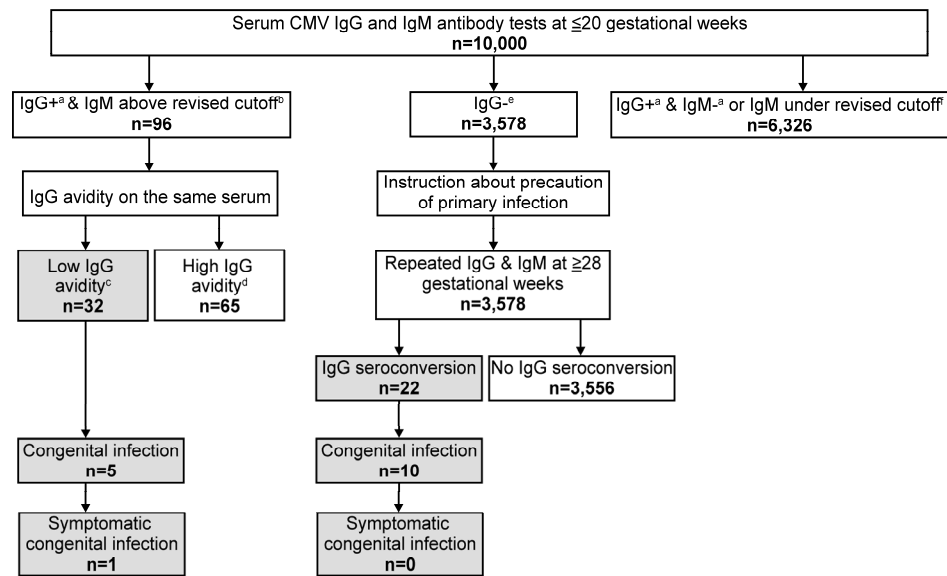

**Supplementary Figure S2.** Flowchart of the maternal cytomegalovirus (CMV) antibody screening program prior to 2017 converted by 10,000 pregnant women. <sup>a</sup>including equivocal IgG. <sup>b</sup>≥4.00 IgM antibody titer index. <sup>c</sup>≤35.0% IgG antibody avidity index. <sup>d</sup>≥35.1% IgG antibody avidity index. <sup>e</sup>with any IgM antibody result. <sup>f</sup><4.00 IgM antibody titer index.

**Supplementary Table S1.** Proportions of pregnant women with low cytomegalovirus (CMV) immunoglobulin (Ig) G avidity and infants with congenital CMV infections among pregnant women with positive (including equivocal) IgG and IgM above the original cutoff (≥1.21) during the corresponding periods

| Study period                                                                                                                   | April 2017–March 2019                             | September 2013–March 2017                          | P value |
|--------------------------------------------------------------------------------------------------------------------------------|---------------------------------------------------|----------------------------------------------------|---------|
| <div>  </div>                               |                                                   |                                                    |         |
| Cutoff of CMV IgM titer to measure IgG avidity as a reflex testing in maternal antibody screening program                      | The revised cutoff (≥4.00 index) of CMV IgM titer | The original cutoff (≥1.21 index) of CMV IgM titer |         |
| Number of pregnant women with positive CMV IgG* & IgM above the original cutoff (≥1.21 index of IgM titer)                     | 722                                               | 1,037                                              |         |
| Number of pregnant women with positive CMV IgG* & IgM above the revised cutoff (≥4.00 index of IgM titer)                      | 127 (17.6%)                                       | 184 (17.7%)                                        | 0.95    |
| Number of pregnant women with positive CMV IgG*, IgM above the revised cutoff, & low IgG avidity (≤35.0% of IgG avidity index) | 35 (4.8%)                                         | 67 (6.5%)                                          | 0.18    |
| Number of pregnant women with infant congenital CMV infection including symptomatic infection                                  | 7 (1.0%)                                          | 8 (0.8%)                                           | 0.79    |
| Number of pregnant women with infant symptomatic congenital CMV infection                                                      | 2 (0.3%)                                          | 1 (0.1%)                                           | 0.57    |

\*Including equivocal IgG. CMV, cytomegalovirus; Ig, immunoglobulin
